# Supplementary material
Source: PubMed Central journal article supplement (PMC9947800)

## Supplemental Online Content

Varley PR, Buchanan D, Bilderback A, et al. Association of routine preoperative frailty assessment with 1-year postoperative mortality. *JAMA Surgery*. Published online February 22, 2023. doi:10.1001/jamasurg.2022.8341

**eTable.** Sensitivity Analysis for Changes in 365-Day Mortality Before and After BPA Initiation From Multivariable Gaussian Regression

**eFigure.** Sensitivity Analysis for Timing of RAI Assessment

This supplemental material has been provided by the authors to give readers additional information about their work.

**eTable. Sensitivity Analysis for Changes in 365-Day Mortality Before and After BPA Initiation From Multivariable Gaussian Regression**

|                     | Level Change        | p-value | Trend Change         | p-value |
|---------------------|---------------------|---------|----------------------|---------|
| RAI within 90 Days  | -0.12 (-0.85, 0.60) | 0.739   | -0.19 (-0.26, 0.11)  | < 0.001 |
| RAI within 180 Days | -2.11 (-4.27, 0.04) | 0.055   | -0.35 (-0.53, -0.18) | < 0.001 |
| RAI within 270 Days | -0.36 (-0.95, 0.25) | 0.233   | -0.16 (-0.22, -0.09) | < 0.001 |

Legend: CI, confidence interval. Confidence intervals estimated from a multivariable Poisson regression model of mortality. Models for 180- and 365-day mortality included a lag term. The coefficient for Level change assesses whether mortality dropped at the time of BPA initiation. The coefficient for Trend Change assesses the slope of the line after BPA initiation.

### eFigure. Sensitivity Analysis for Timing of RAI Assessment

Plots demonstrate 365-day mortality rates before and after BPA implementation when using RAI scores calculated within (A) 90 days and (B) 180 days of surgery, as opposed to the 270-day cutoff used in the primary analysis. Rates are expressed as deaths per 100 procedures. Implementation is noted by the vertical line (February 2018). The solid blue lines are actual mortality rates, and the dotted red trend lines represent predictions based on GLM regression. The dotted green trend lines represent a counterfactual situation where the pre-intervention trend would continue into the post-intervention period. Comparison between the post-intervention trend line and the counterfactual trend line represents the effect of BPA implementation.

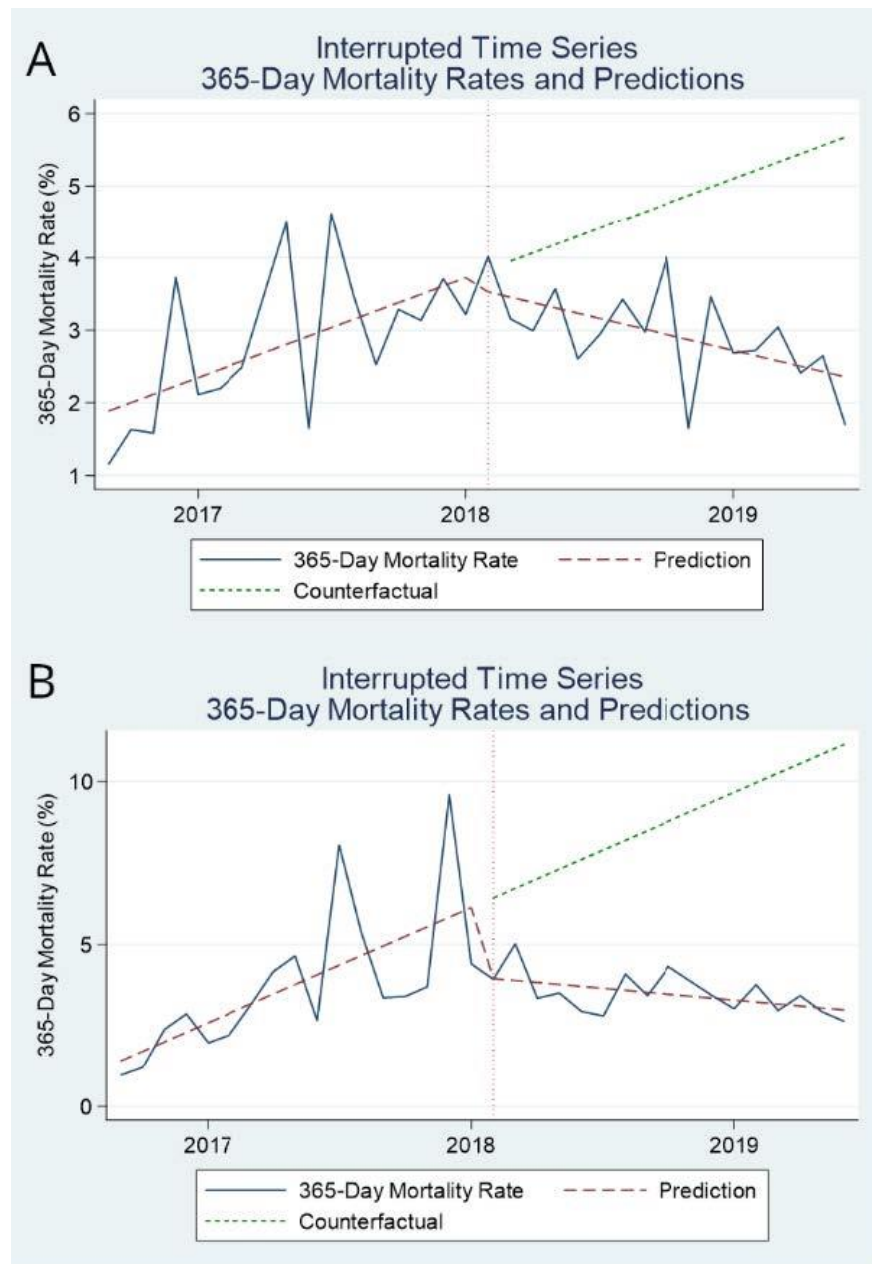

Supplement: jamasurg-e228341-s001.pdf [file jamasurg-e228341-s001.pdf]
